# Supplementary material for: Application of polyethylenimine-coated magnetic nanocomposites for the selective separation of Cs-enriched clay particles from radioactive soil
Source: Royal Society of Chemistry journal article supplement (doi:10.1039/d0ra03426f), 2020-01-01

## Supplementary materials

**Figure S1.** FTIR spectra of naked  $\text{Fe}_3\text{O}_4$  nanoparticles and  $\text{Fe}_3\text{O}_4$ -PEI nanocomposites.

**Figure S2.** Weight-loss curves of naked  $\text{Fe}_3\text{O}_4$  nanoparticles and  $\text{Fe}_3\text{O}_4$ -PEI nanocomposites.

**Figure S3.** Photographs of (a) hydrobiotite (HBT) dispersed in solution, (b) sedimentation of the HBT with naked  $\text{Fe}_3\text{O}_4$  nanoparticles, and (c) sedimentation of the HBT with  $\text{Fe}_3\text{O}_4$ -PEI nanocomposites at different sedimentation time (0 to 120 s)

**Figure S1**

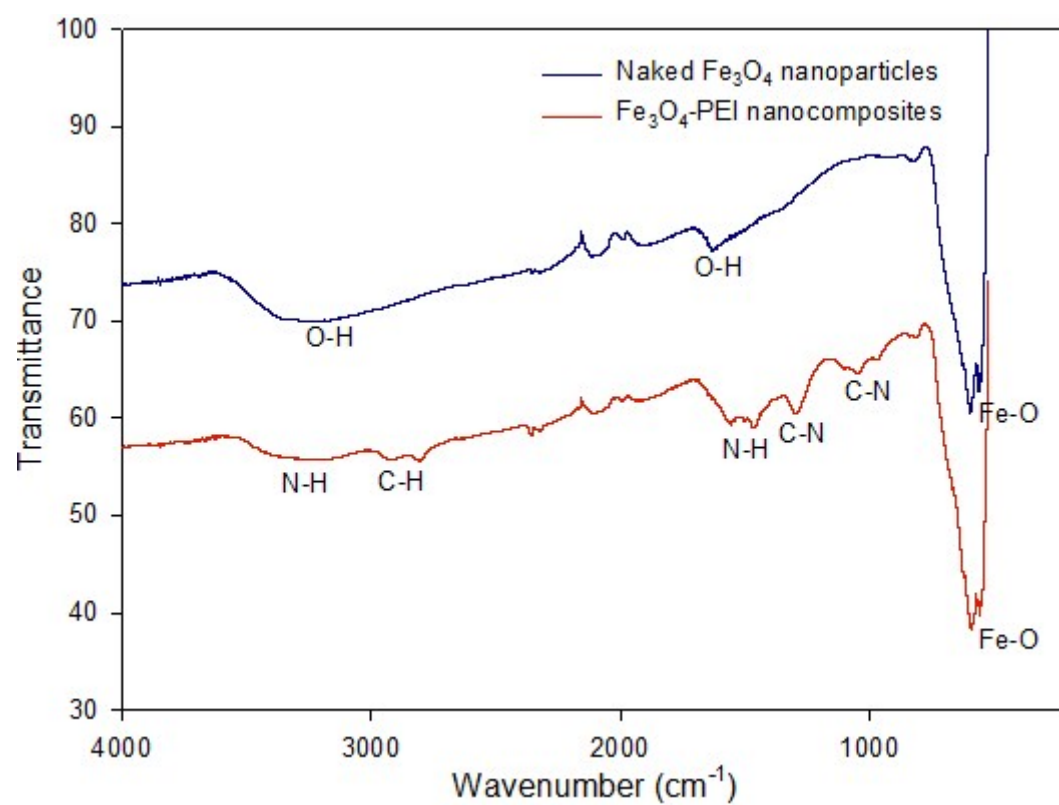

**Figure S2**

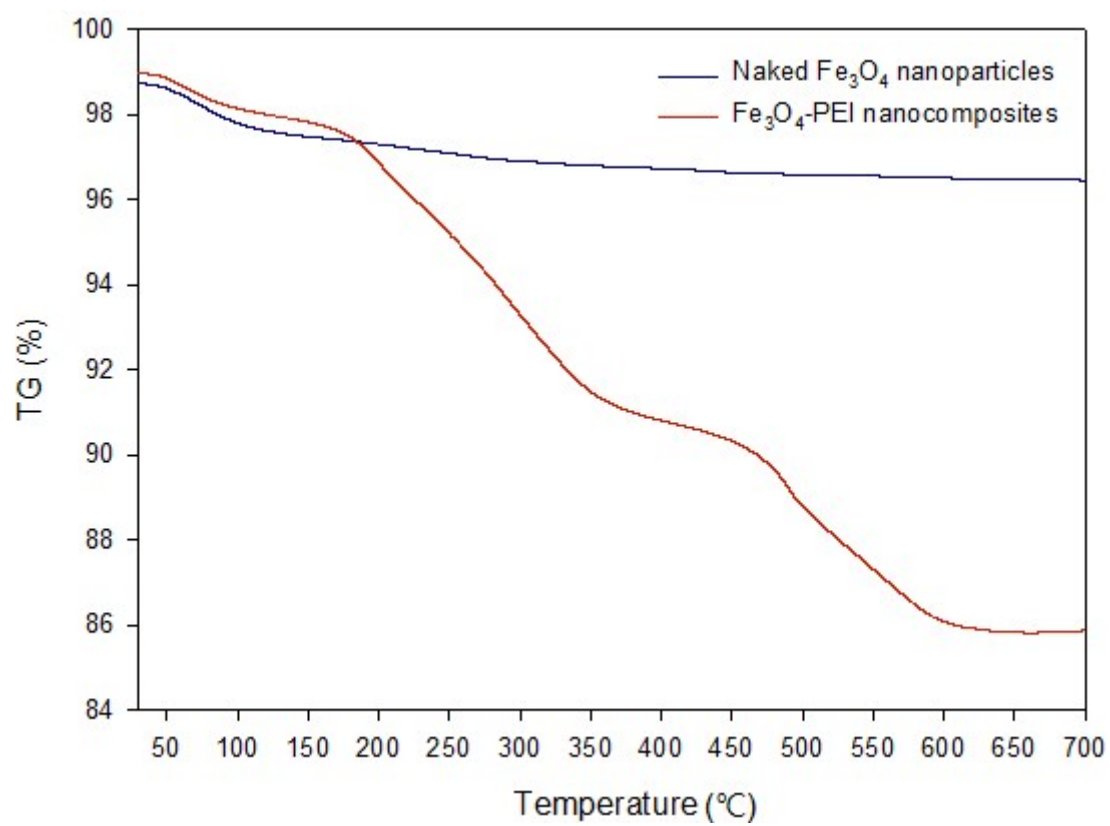

Figure S3

**(a) HBT**

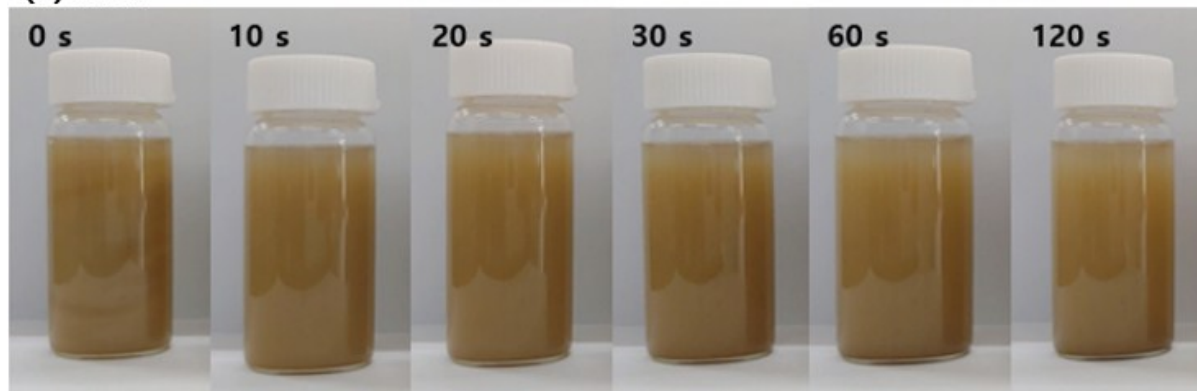

**(b) HBT/naked  $\text{Fe}_3\text{O}_4$  nanoparticles**

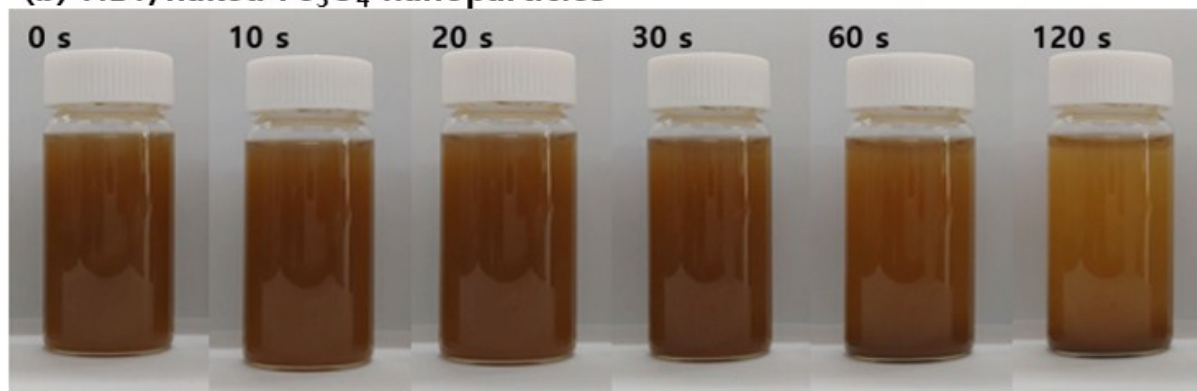

**(c) HBT/ $\text{Fe}_3\text{O}_4$ -PEI nanocomposites**

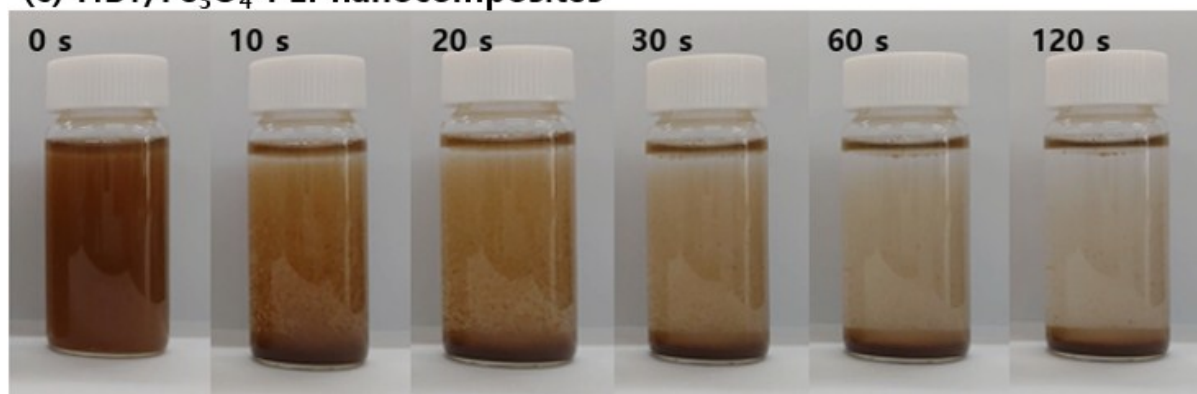

Supplement: d0ra03426f1.pdf [file d0ra03426f1.pdf]
